# Supplementary material for: Potential-Growth Indicators Revisited: More Merits of Indication
Source: Preprints.org preprint supplement (doi:10.20944/preprints202106.0029.v1), 2021-06-01
Supplement: Supplementary file 1 [file supplementary]

# 1 Supplementary Material to

## 2 Potential-Growth Indicators Revisited: More Merits of Indication

3 **Dmitrii O. Logofet <sup>1,\*</sup> and Valerii N. Razzhavaikin <sup>2</sup>**

4 <sup>1</sup> Laboratory of Mathematical Ecology, A.M. Obukhov Institute of Atmospheric Physics, Russian Academy of Sciences, Moscow 119 017, Russia; [danilal@postman.ru](mailto:danilal@postman.ru)

5 <sup>2</sup> Federal Research Center “ Computer Science and Control” of Russian Academy of Sciences, Moscow, 119333 Russia; [razzha@mail.ru](mailto:razzha@mail.ru)

6 \* Correspondence: [danilal@postman.ru](mailto:danilal@postman.ru)

7  
8 Matlab functions *diopha21\_1* and *diopha21\_2* find all the solutions to the Diophantine systems of equations and inequalities (17), (21) and (18), (22)  
9 respectively for 9 and 13 integer-valued parameters. Below is the Matlab code for the more cumbersome *diopha21\_2* (Colony II), the reduction to Colony I being  
10 obvious.

```
11 function [Pars, Lams] = diopha21_2
12 % finds all the solutions of the Diophantine system of equations&inequalities
13 % Colony 2 without excavation; hierarchy (6C) among parent Contributions
14 % reproductive-core 6x6 submatrix Lcor only (size L2 = 14x14)
15 % Output variables: Lams, vector of 2  $\lambda$ s extremal values over the set of solutions;
16 % Pars, 13x2 matrix of extremal parameters.
17 % @ Logofet 26.04.2021.
18 global ns % assign also in workspace
19 ns = 0;%number of solutions
20 Lcor=[0, 0, 0, 0, 0, 0;
21      18/61, 0, 0, 0, 0, 0;
22      0, 0, 0, 0, 0, 0;
23      14/61, 0, 2/3, 0, 0, 0;
24      0, 0, 0, 0, 0, 0;
```

```

25     16/61, 0, 0, 0, 1, 0]; % reproductive-core 6x6 submatrix, without birth rates
26     lam1min = 100; lam1max = 0;% unreal values to begin with
27     a_min=0;b_min=0;c_min=0;d_min=0;e_min=0;f_min=0;g_min=0;h_min=0;k_min=0;l_min=0;m_min=0;n_min=0;o_min=0;
28     a_max=0;b_max=0;c_max=0;d_max=0;e_max=0;f_max=0;g_max=0;h_max=0;k_max=0;l_max=0;m_max=0;n_max=0;o_max=0;
29     for a=122:178 a,% 122=207-(14+30+10+5+26),178=61*3-(1+1+1+1+1).
30         for b=1:14% 1 due to 207-(178+30+10+5+26)<0, 14 when all the rhizomes go to v1.
31             for c=1:29% 1 due to 207-(178+14+10+5+26)<0, 29=30-1.
32                 for d=1:9% 1 due to 207-(187+14+30+...)<0, 9=10-1.
33                     for e=1:4% similarly, 4= 5-1.
34                         for f=1:24% similarly, 24= 26-(1+1).
35                             for g=1:50% 1 due to 54-(29+9+4+24)<0, 50=54-(1+1+1+1).
36                                 for h=1:29% 1 due to 54-(50+9+4+24)<0, 29=30-1.
37                                     for k=1:9% 1 due to 54-(50+29+4+24)<0, 9=10-1.
38                                         for l=1:4% similarly, 4=5-1.
39                                             for m=1:24% similarly, 24=26-2.
40                                                 for n=1:6% 6 = 7-1.
41                                                     for o=1:6% 6 = 7-1. Hierarchy (6C):  $a+g+n \leq c+h \leq b \leq d+k \leq m+o$ 
42                                                         C1=a+g+n;C2=c+h;C3=f+m+o;C4=b;C5=d+k;C6=e+l;%for hierarchy (6C)
43                                     if a+b+c+d+e+f==207)&&((g+h+k+l+m)==54)&&((n+o)==7)&&(C1>=C2)&&(C2>=C3)&&(C3>=C4)&&(C4>=C5)&&(C5>=C6)
44                                         ns = ns +1;% one more solution
45                                         Lcor(1,1:8)=[a/61,b/8,0,c/6,d/6,0,e/1,f/6];
46                                         Lcor(4,1:8)=[g/61,0,0,h/6,k/6,0,l/1,m/6];%'el'/1
47                                         Lcor(7,1:8)=[n/61,0,0,0,0,0,o/6];% assigning the birth rates
48                                         lam1 = max(eig(Lcor));
49                                         if (lam1 < lam1min), lam1min = lam1;
50                                             a_min = a;b_min = b;c_min = c;d_min = d;e_min = e;f_min = f;g_min = g;h_min = h;
51                                             k_min = k;l_min = l;m_min = m;n_min = n;o_min = o; end

```

```

52         if (lam1 > lam1max), lam1max = lam1;
53             a_max = a;b_max = b;c_max = c;d_max = d;e_max = e;f_max = f;g_max = g;h_max = h;
54             k_max = k;l_max = l;m_max = m;n_max = n;o_max = o;end
55         end
56     end
57 end
58 end
59 end
60 end
61 end
62 end
63 end
64 end
65 end
66 end
67 end
68 end
69 ns %the number of solutions
70 Lams = [lam1min, lam1max];
71 Pars = [a_min b_min c_min d_min e_min f_min g_min h_min k_min l_min m_min n_min o_min]';
72 Pars = [Pars, [a_max b_max c_max d_max e_max f_max g_max h_max k_max l_max m_max n_max o_max]'];
73
74     Below is a Matlab expression for  $R_{RT}(L_{cor2})$  as a function of 13 parameters  $a, b, \dots, n, o$ :
75     max([a/61 + (9*b)/244,
76 a/61 + (9*b)/244 + (7*d)/183 + h/6 + k/9 - (a*h)/366 - (3*b*h)/488 + (c*g)/366 + (d*g)/549 - (a*k)/549 - (7*d*h)/1098 - (b*k)/244 + (7*c*k)/1098,
77 a/61 + (9*b)/244 + (7*d)/183 + (8*f)/183 + h/6 + k/9 + o/6 - (a*h)/366 - (3*b*h)/488 + (c*g)/366 + (d*g)/549 - (a*k)/549 - (7*d*h)/1098 - (b*k)/244 + (7*c*k)/1098 -
78 (4*f*h)/549 - (a*o)/366 + (4*c*m)/549 - (3*b*o)/488 + (8*d*m)/1647 - (8*f*k)/1647 - (7*d*o)/1098 + (e*n)/61 + (8*e*o)/183 + (f*n)/366 - (h*o)/36 - (k*o)/54 + (a*h*o)/2196 +

```

$$\begin{aligned}
& (b^*h^*o)/976 - (c^*g^*o)/2196 - (d^*g^*o)/3294 + (a^*k^*o)/3294 + (7^*d^*h^*o)/6588 - (e^*h^*n)/366 + (b^*k^*o)/1464 - (4^*e^*h^*o)/549 - (f^*h^*n)/2196 - (c^*k^*o)/94 + (c^*l^*n)/366 + \\
& (4^*c^*l^*o)/549 + (c^*m^*n)/2196 + (d^*l^*n)/549 - (e^*k^*n)/549 + (8^*d^*l^*o)/1647 + (d^*m^*n)/3294 - (8^*e^*k^*o)/1647 - (f^*k^*n)/3294, \\
& a/61 + (9^*b)/244 + (7^*d)/183 + h/6 + k/9 - (a^*h)/366 - (3^*b^*h)/488 + (c^*g)/366 + (d^*g)/549 - (a^*k)/549 - (7^*d^*h)/1098 - (b^*k)/244 + (7^*c^*k)/1098 + (e^*n)/61 - (e^*h^*n)/366 + \\
& (c^*l^*n)/366 + (d^*l^*n)/549 - (e^*k^*n)/549, a/61 + (9^*b)/244 + h/6 - (a^*h)/366 - (3^*b^*h)/488 + (c^*g)/366, \\
& a/61])
\end{aligned}$$
